# Supplementary material for: It's Money! Real-World Grant Experience through a Student-Run, Peer-Reviewed Program
Source: Atypon-hosted journal article supplement (doi:10.1187/cbe.12-05-0058), 2013-09-01
Supplement: combinedsupmats1.pdf [file combinedsupmats1.pdf]

# Supplemental Material

*CBE—Life Sciences Education*

Dumanis *et al.*

# Medical Center Graduate Student Organization

## SRGP (Student Research Grant Proposal)

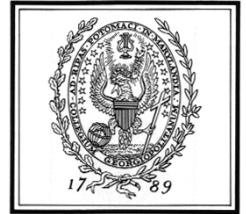

Georgetown University MCGSO  
3970 Reservoir Road NW  
Washington, DC

### Form 1-1 Coveragepage

Date:

New  Revised

Name:

NetID:

Department:

Mentor:

Lab/Office Number:

Work Phone:

Cell Phone:

### Application Checklist

Application Title:

Did you include:

- Abstract/Specific Aims (Form 1-2)
- Research Plan (Form 1-3)
- Biosketch (Form 1-4)
- Preliminary Data and Tables (Optional) (Form 1-5)
- Budget (Form 1-6)
- Departmental and Mentor Confirmation (Form 1-7)

Have you applied for other extramural funding:

yes  no

Where was application submitted?:  Explanation (if no):

Date submitted:

Budget Information:

Total Budget Requested:

For Committee Only:

# Form 1-2 Abstract and Aims

PI (Last, First):

Application Title:

Abstract (do not exceed the space provided):

Specific Aims:

***Research Plan will be scored based on the following 3 criteria: Significance, Innovation and Approach  
In 3 pages or less outline relevant background, specific methods, and outcomes/interpretation, while  
addressing the criteria above. Document must have 0.5" margins and use Arial 11 typeface.  
References are not included in the page limit, and should be complete (full author list).***

# Form 1-4 Biosketch

PI (Last, First):

## Education/Training

Institution and Location

Field of Study

Degree

Georgetown University, Washington, DC

PhD

## Research Experience Please list/describe your previous research experience (prior to joining your current lab)

## Dissertation Topic Please describe (briefly) your dissertation topic

PI (Last, First):

## Abstracts

Please list all abstracts for talks and presentations given at professional meetings

## Papers

Please list all publications in scientific journals (if not yet published, indicate if "in press" or "accepted" or "submitted")

***Preliminary Data and Tables  
Not to exceed 1 page  
Document must have 0.5" margins and use Arial 11 typeface.***

# Form 1-6 Budget

PI (Last, First):

Application Title:

| Category               | Description | Amount |
|------------------------|-------------|--------|
| Reagents               |             |        |
| Animals                |             |        |
| Use of core facilities |             |        |
| Participant costs      |             |        |
| Equipment              |             |        |
| Software               |             |        |
| Travel*                |             |        |
| Other**                |             |        |
| <b>Grand Total</b>     |             |        |

\*, \*\* in addition to budget justification, you must include additional justification for these categories in the boxes below

**Budget  
Justification:**

**\*Travel  
Justification:**

**\*\*Other  
Justification:**

## Internal Use Only

|                 |  |
|-----------------|--|
| Amount Awarded: |  |
| Start Date:     |  |



# Form 1-7 Departmental and Mentor Confirmation

## SRGP - Student Research Grant Proposal

Student Name (Last, First):

Degree Program

Thesis Mentor (Last, First):

## Departmental Confirmation

I certify that \_\_\_\_\_ is in good standing in his/her Ph.D. program, has passed required comprehensive examinations and has begun thesis research.

---

Signature (Director of Graduate Studies)

Date

## Mentor Confirmation

I am aware that \_\_\_\_\_ is applying for a student research grant under MCGSO.

This confirms that the proposed experiments are beyond the scope of what is supported in my laboratory, and require another source of funding to be completed.

## Mentor Letter of Support

Please evaluate the likelihood of this projects success and comment on how it would expand training for your student.

---

Signature (Mentor)

Date

Modified from:  
[grants.nih.gov/grants/peer/guidelines\\_general/scoring\\_system\\_and\\_procedure.pdf](https://grants.nih.gov/grants/peer/guidelines_general/scoring_system_and_procedure.pdf)

### **Instructions for Reviewers:**

- The MCGSO-SRGP grant application scoring system uses the same 9-point scale used by NIH.
- A score of 1 indicates an exceptionally strong application with essentially no weaknesses.
- A score of 9 indicates an application with serious and substantive weaknesses with very few strengths; 5 is considered an average score.
- Ratings are in whole numbers only (no decimal ratings).
- This scale is used by all eligible (without conflict of interest) SRG (Scientific Review Group) members to provide an overall impact/priority score and for assigned reviewers to score four individual criteria (e.g., Significance, Investigator, Innovation, Approach)
- For the impact/priority score rating, strengths and weaknesses across all of the review criteria should be considered
- For each criterion rating, the strengths and weaknesses within that review criterion should be considered
- Reviewers should consider not only the relative number of strengths and weaknesses noted, but also the importance of these strengths and weaknesses to the criteria or to the overall impact when determining a score
- For example, a major strength may outweigh many minor and correctable weaknesses

### **Preliminary Scores:**

- Before the review meeting, assigned reviewers will determine preliminary scores for each of the four scored review criteria and a preliminary score for the overall impact/priority
- The impact/priority score should reflect the reviewer's overall evaluation, not a numerical average of individual criterion scores
- Reviewers should consider the full range of the rating scale and the scoring descriptors in assigning preliminary and final scores
- However, a reviewer should not assume that the applications assigned to him/her necessarily cover that entire range of scores, and should assign scores as appropriate for the work or science proposed.
- An application does not need to be strong in all categories to be judged likely to have major impact, for example, a project that by its nature is not innovative may be essential to advance a field

### **Criterion Scoring:**

- Criterion scores are intended to provide additional information on how each assigned reviewer weighed that particular section so that the reader has a better idea of strengths and weaknesses that need improvement
- Providing scores without providing comments in the review critique is unacceptable
- The impact/priority score for the application is not intended to be an average of

Modified from:

[grants.nih.gov/grants/peer/guidelines\\_general/scoring\\_system\\_and\\_procedure.pdf](https://grants.nih.gov/grants/peer/guidelines_general/scoring_system_and_procedure.pdf)

criterion scores

- If the reviewer's opinion changed as a result of discussion at the meeting, the reviewer should change his/her criterion scores to match his/her critiques and overall impact/priority score
- The criterion scores appear in a table at the beginning of each critique in the summary statement

### **Impact/Priority Score:**

- Applications will receive numerical impact/priority scores from all eligible reviewers (e.g., without conflicts of interest)
- The impact/priority score for an application is based on each individual reviewer's assessment based on the four scored criteria plus additional criteria (regarding training potential, relationship to thesis, and budget).
- Reviewers are guided to use the full range of the rating scale and spread their scores to better discriminate among applications
- Reviewers whose evaluations or opinions of an application fall outside the range of those presented by the assigned reviewers and discussant(s) should ensure that their opinions are brought to the attention of the entire committee
- In addition, the SRO and Chairperson should ensure that all opinions are voiced before final scoring is conducted
- Reviewers should feel free to assign the score that they believe best represents the impact of the application, and not feel constrained to limit their scores to the upper half of the score range if they do not feel such a score is warranted
- After the meeting, individual reviewer scores will be averaged and the result multiplied by 10 to determine the final impact/priority score
- The range of the final application scores is from 10 to 90
- For the impact/priority score and for the individual criterion scores, the far right column (in the table below) provides a descriptive guide of how strengths and weaknesses are considered in assigning a rating

**Minor weakness:** easily addressable weakness, does not substantially lessen impact **Moderate**

**weakness:** lessens impact

**Major weakness:** Severely limits impact

## MCGSO-SRGP Review

Principal Investigator:

### OVERALL IMPACT

Please provide an overall impact score to reflect your assessment of the project. This score should reflect your weighting of the review criteria below. An application does not have to be strong in every category to have a positive overall score. You may weight the different strengths and weaknesses as you deem appropriate.

The MCGSO grant application scoring system uses the same 9-point scale that NIH uses (ie. the lower the score, the better the application). Therefore a score of 1 would be for an exceptionally strong application with essentially no weaknesses. Ratings are in whole numbers only (no decimal ratings).

|                                                                                                          |
|----------------------------------------------------------------------------------------------------------|
| Overall Impact <i>Write a paragraph summarizing the factors that informed your Overall Impact score.</i> |
|                                                                                                          |
| <b>Overall Score:</b>                                                                                    |

### SCORED REVIEW CRITERIA

Reviewers will consider each of the five review criteria below in the determination of scientific and technical merit, and give a separate score for each.

|                                                                                       |
|---------------------------------------------------------------------------------------|
| 1. Significance: Will this research advance the student in his/her scientific career? |
| <b>Strengths</b><br>•                                                                 |
| <b>Weaknesses</b><br>•                                                                |
| <b>Score:</b>                                                                         |

|                                                                                                                                                                                |
|--------------------------------------------------------------------------------------------------------------------------------------------------------------------------------|
| 2. Investigator: How productive has this investigator been prior to submitting this application?<br>Does the investigator have the necessary skills to complete this proposal? |
| <b>Strengths</b><br>•                                                                                                                                                          |
| <b>Weaknesses</b><br>•                                                                                                                                                         |
| <b>Score:</b>                                                                                                                                                                  |

|                                                                                                      |
|------------------------------------------------------------------------------------------------------|
| 3. Innovation: How novel is this research?<br>Will this research contribute to the scientific field? |
| <b>Strengths</b> <ul style="list-style-type: none"><li>•</li></ul>                                   |
| <b>Weaknesses</b> <ul style="list-style-type: none"><li>•</li></ul>                                  |
| <b>Score:</b>                                                                                        |

|                                                                                                                                                                                                                                   |
|-----------------------------------------------------------------------------------------------------------------------------------------------------------------------------------------------------------------------------------|
| 4. Approach: How clear and organized is the applicant in outlining his research?<br>Is this proposal likely to be completed given the times and funds requested?<br>Are the methods proposed likely to answer the question asked? |
| <b>Strengths</b> <ul style="list-style-type: none"><li>•</li></ul>                                                                                                                                                                |
| <b>Weaknesses</b> <ul style="list-style-type: none"><li>•</li></ul>                                                                                                                                                               |
| <b>Score:</b>                                                                                                                                                                                                                     |

### ADDITIONAL REVIEW CONSIDERATIONS

|                                                             |
|-------------------------------------------------------------|
| Relation to Thesis/Further Training Potential               |
| Comments: <ul style="list-style-type: none"><li>•</li></ul> |

|                                                                                                                             |
|-----------------------------------------------------------------------------------------------------------------------------|
| Budget and Period of Support: How reasonable is the budget for this proposal?<br>If not, what would be a reasonable budget? |
| Recommended budget modifications: <ul style="list-style-type: none"><li>•</li></ul>                                         |

## FOR RESUBMISSION/RENEWALS

If Applicable:

Comments:

- 

### ADDITIONAL COMMENTS TO APPLICANT

Reviewers may provide guidance to the applicant or recommend against resubmission without fundamental revision.

Additional Comments to Applicant (Optional)

-

**MCGSO-SRGP CERTIFICATION FORM**

**RE: CONFLICT OF INTEREST, CONFIDENTIALITY, AND NON-DISCLOSURE  
FOR REVIEWERS OF GRANTS**

Name (Last, First):

Address:

Date(s) of review:

I certify that I am not a member of the lab or currently collaborating with the lab from which a proposal was submitted. I certify that to the best of my knowledge I have disclosed all conflicts of interest that I may have with the applications and I fully understand the confidential nature of the review process and agree: (1) to destroy or return all materials related to it and (2) not to disclose or discuss the materials associated with the review, my evaluation, or the review meeting with any other individual except as authorized by the Program Coordinators (3) not to disclose procurement information prior to the award; and (4) to refer all inquiries concerning the review to the Program Coordinators.

Signature:

Date:

1. What was your role in the SRGP (check all that apply)

- Reviewer
- Applicant (funded)
- Applicant (non-funded)
- Program Officer

2. To what degree has your SRGP experience helped you with the following aspects of grant writing:

Conceptualizing a project      Not Helpful   Slightly Helpful   Moderately Helpful   Very Helpful

Defining the project              Not Helpful   Slightly Helpful   Moderately Helpful   Very Helpful

Refining the project and approach      Not Helpful   Slightly Helpful   Moderately Helpful   Very Helpful

Understanding the review process      Not Helpful   Slightly Helpful   Moderately Helpful   Very Helpful

Organization, formatting, and style      Not Helpful   Slightly Helpful   Moderately Helpful   Very Helpful

3. To what degree:

Did your SRGP experience enhance your professional development?      Not at all   Mildly   Moderately   Strongly

Would you recommend participating in SRGP to your friends/colleagues?      Not at all   Mildly   Moderately   Strongly

4. For those that resubmitted: How much did you change your application in response to reviewer feedback?

- 0%
- 1-25%
- 26-50%
- 51-75%
- 76-100%
